# Supplementary material for: Stereodynamics of adiabatic and non-adiabatic energy transfer in a molecule surface encounter
Source: Royal Society of Chemistry journal article supplement (doi:10.1039/d2cp03312g), 2022-01-01
Supplement: d2cp03312g1.pdf [file d2cp03312g1.pdf]

**Electronic Supplementary Information:**

**Stereodynamics of Adiabatic and Non-adiabatic Energy Transfer in a Molecule**

**Surface Encounter**

Yaolong Zhang<sup>1‡</sup>, Connor L. Box<sup>2‡</sup>, Tim Schäfer<sup>3,4</sup>, Alexander Kandratsenka<sup>3,4</sup>, Alec M. Wodtke<sup>3,4</sup>, Reinhard J. Maurer<sup>2\*</sup>, and Bin Jiang<sup>1\*</sup>

<sup>1</sup>*Department of Chemical Physics, School of Chemistry and Materials Science, Key Laboratory of Surface and Interface Chemistry and Energy Catalysis of Anhui Higher Education Institutes, University of Science and Technology of China, Hefei, Anhui 230026, China*

<sup>2</sup>*Department of Chemistry, University of Warwick, Gibbet Hill Road, Coventry, CV4 7AL, United Kingdom*

<sup>3</sup>*Institute for Physical Chemistry, Georg-August University of Göttingen, Göttingen, 37077, Germany*

<sup>4</sup>*Department of Dynamics at Surfaces, Max Planck Institute for Biophysical Chemistry, Göttingen, 37077, Germany*

‡: these authors contribute equally to the work.

\*: corresponding authors: [r.maurer@warwick.ac.uk](mailto:r.maurer@warwick.ac.uk); [bjiangch@ustc.edu.cn](mailto:bjiangch@ustc.edu.cn)

## Table of Contents

I. Figs. S1-S7

S3-S9

## Supplementary Figs

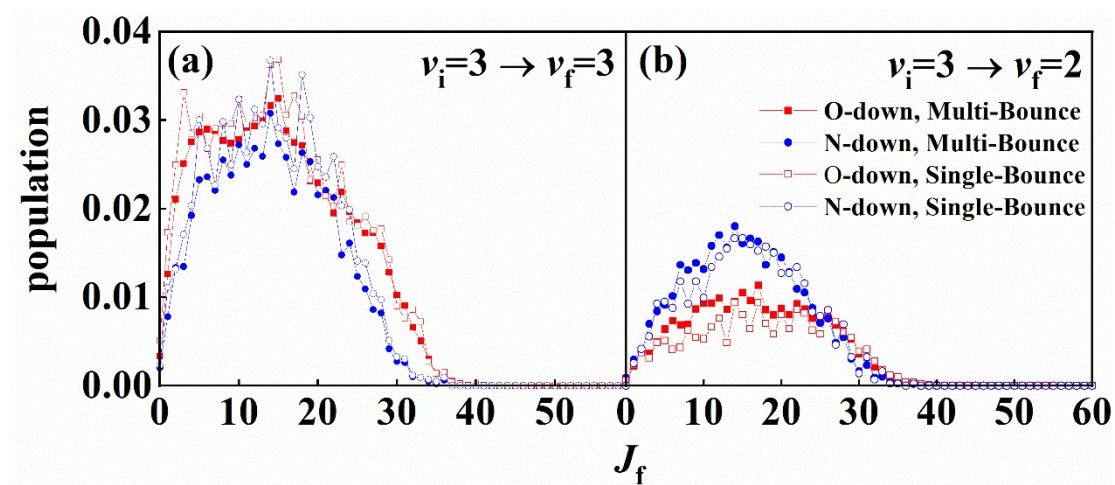

**Fig. S1.** Comparison of rotational state distributions of vibrationally elastic ( $v_f=3$ ) and inelastic ( $v_f=2$ ) scattering of  $\text{NO}(v_i=3)$  from  $\text{Au}(111)$ , resulted from multi-bounce (filled) and single-bounce (open) trajectories calculated by molecular dynamics with electronic friction (MDEF) using Kohn-Sham orbital-dependent friction (ODF), at  $E_i = 0.27$  eV for N-first (blue) and O-first (red) orientations.

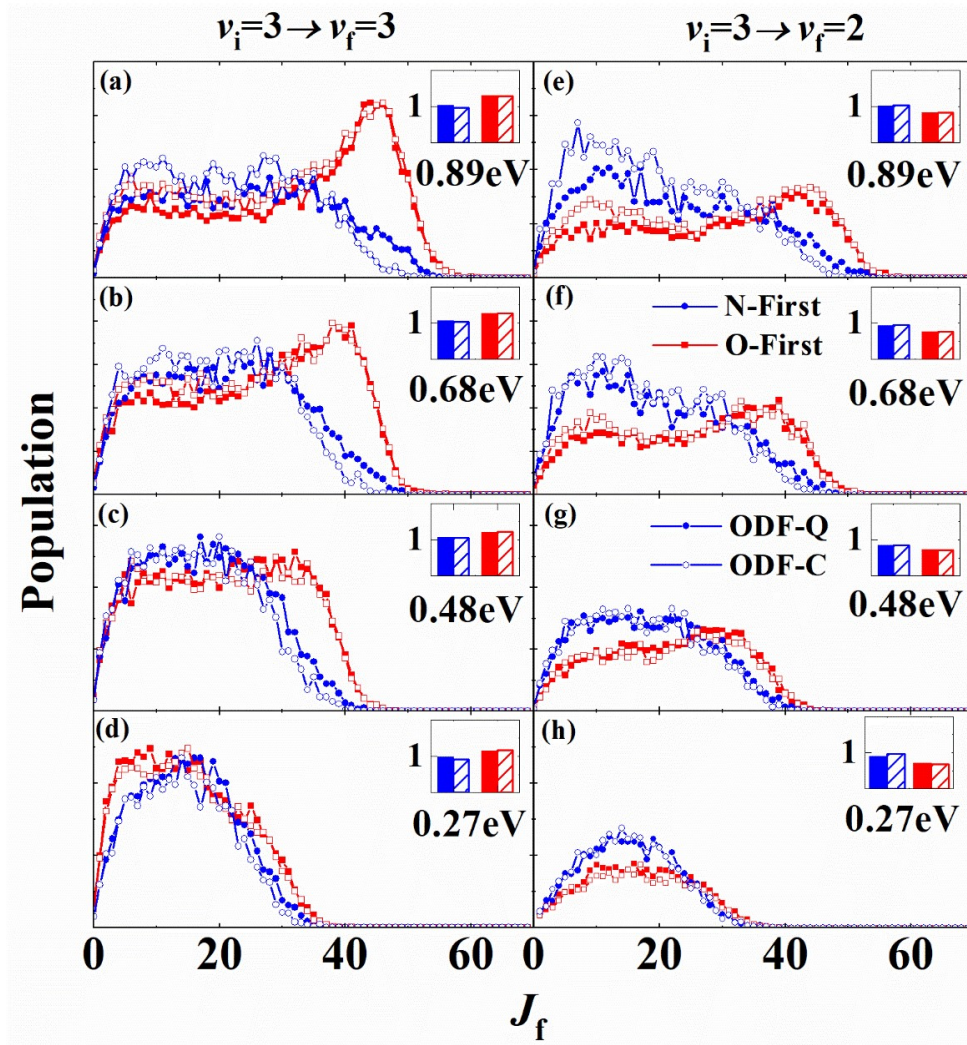

**Fig. S2.** Comparison of theoretical final rotational state distributions of vibrationally elastic ( $v_f=3$ ) and inelastic ( $v_f=2$ ) scattering of  $\text{NO}(v_i=3)$  from Au(111) with  $E_i$  ranging from 0.27 to 0.89 eV for N-first (blue) and O-first (red) orientations obtained by MDEF simulation with ODF using quantum angular distributions (ODF-Q, filled) and classical angular distribution (ODF-C, open). The inset shows the ratio of the final vibrational state population with N-first (blue) and O-first (red) orientation relative to that with the isotropic orientation.

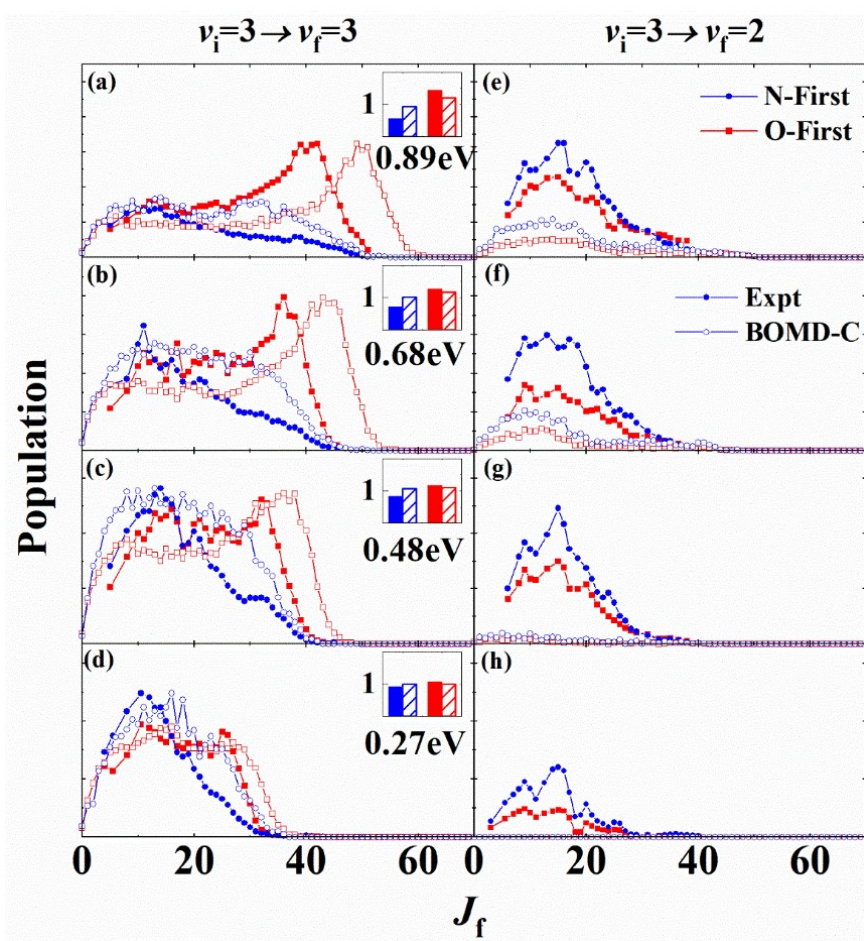

**Fig. S3.** The same as Fig. S2 but for the comparison of results of the experiment (filled) and adiabatic Born Oppenheimer molecular dynamics (BOMD) simulations using classical angular distribution (BOMD-C) (open). At each  $E_i$ , calculated rotational state distributions in both channels are multiplied by the same factor so that the highest theoretical peak matches the highest experimental one. Note that the ratio of the final vibrational state population with N-first (blue) and O-first (red) orientation relative to that with the isotropic orientation is not shown in the vibrationally inelastic channel because the population is so low that the statistics are poor and the result is not meaningful.

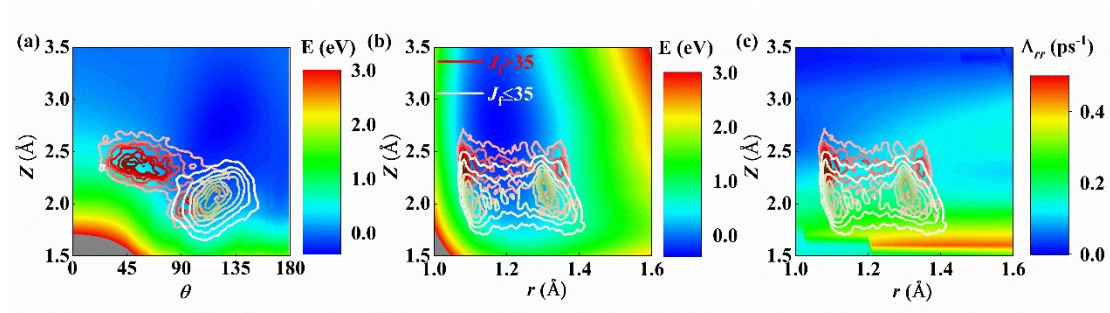

**Fig. S4.** Contour plots of the NO geometries of the closest approach to the surface for ODF-C trajectories scattered to  $J_f \leq 35$  (white) and  $J_f > 35$  (red) with  $E_i = 0.89$  eV. (a) values of the NO center-of-mass altitude above the surface ( $Z$ ) and the orientational angle ( $\theta$ ) are shown superimposed on a 2D cut of the NN-PES (colors). (b) values of  $Z$  and NO bond length ( $r$ ) are shown superimposed on a 2D cut of the NN-PES (colors). (c) the trajectory inner turning points are shown superimposed on the NN-ODF diagonal element ( $\Lambda_{rr}$ ) as a function of  $Z$  and  $r$  (colors) (panel c). Note that the 2D cut of the NN-PES is obtained with all other coordinates optimized on the PES and the surface configuration fixed at the adsorption state.

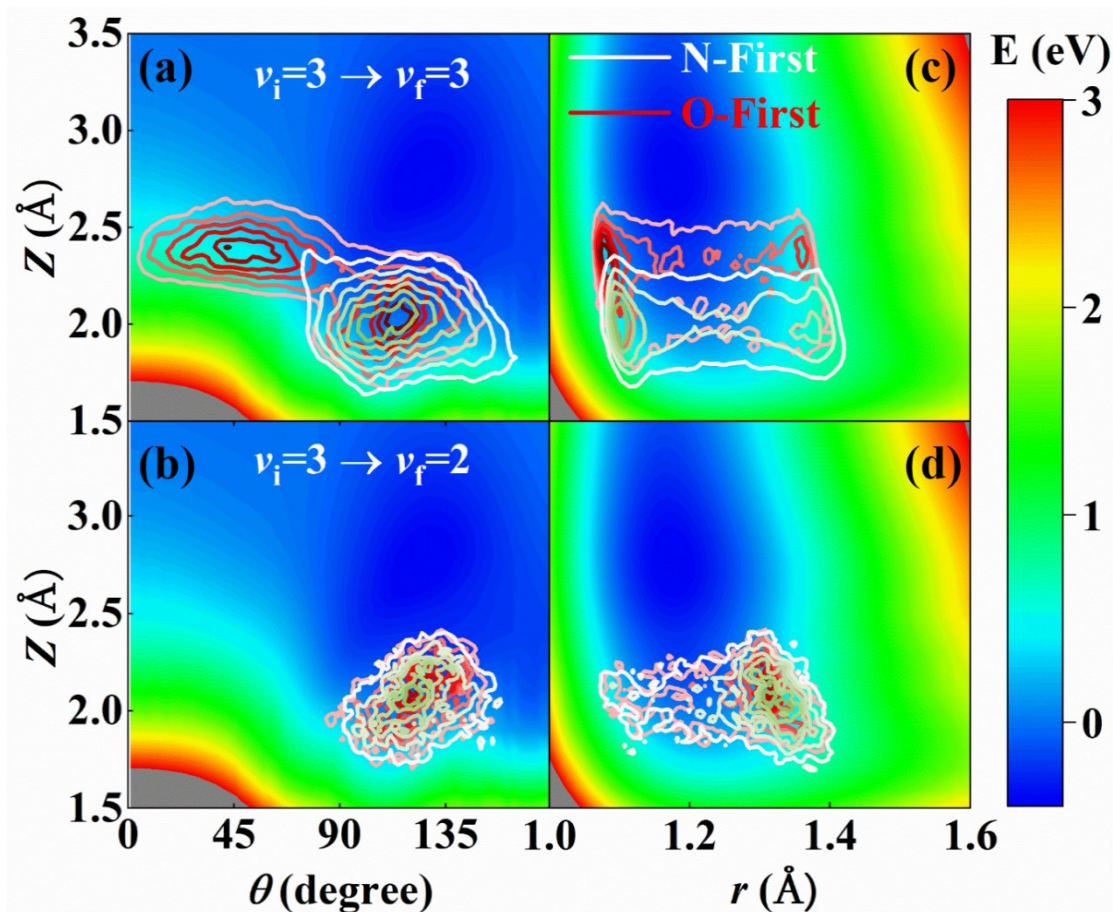

**Fig. S5.** Contour plots of the NO geometries of the closest approach to the surface with initial N-first (white) and O-first (red) orientations in BOMD-C trajectories scattered to  $\nu_f=3$  (top two panels) and  $\nu_f=2$  (bottom two panels) with  $E_i = 0.89$  eV. (a-b) values of the NO center-of-mass altitude above the surface ( $Z$ ) and the orientational angle ( $\theta$ ) are shown superimposed on a 2D cut of the NN-PES (colors). (c-d) values of  $Z$  and NO bond length ( $r$ ) are shown superimposed on a 2D cut of the NN-PES (colors). Note that the 2D cut of the NN-PES is obtained with all other coordinates optimized on the PES and the surface configuration fixed at the adsorption state.

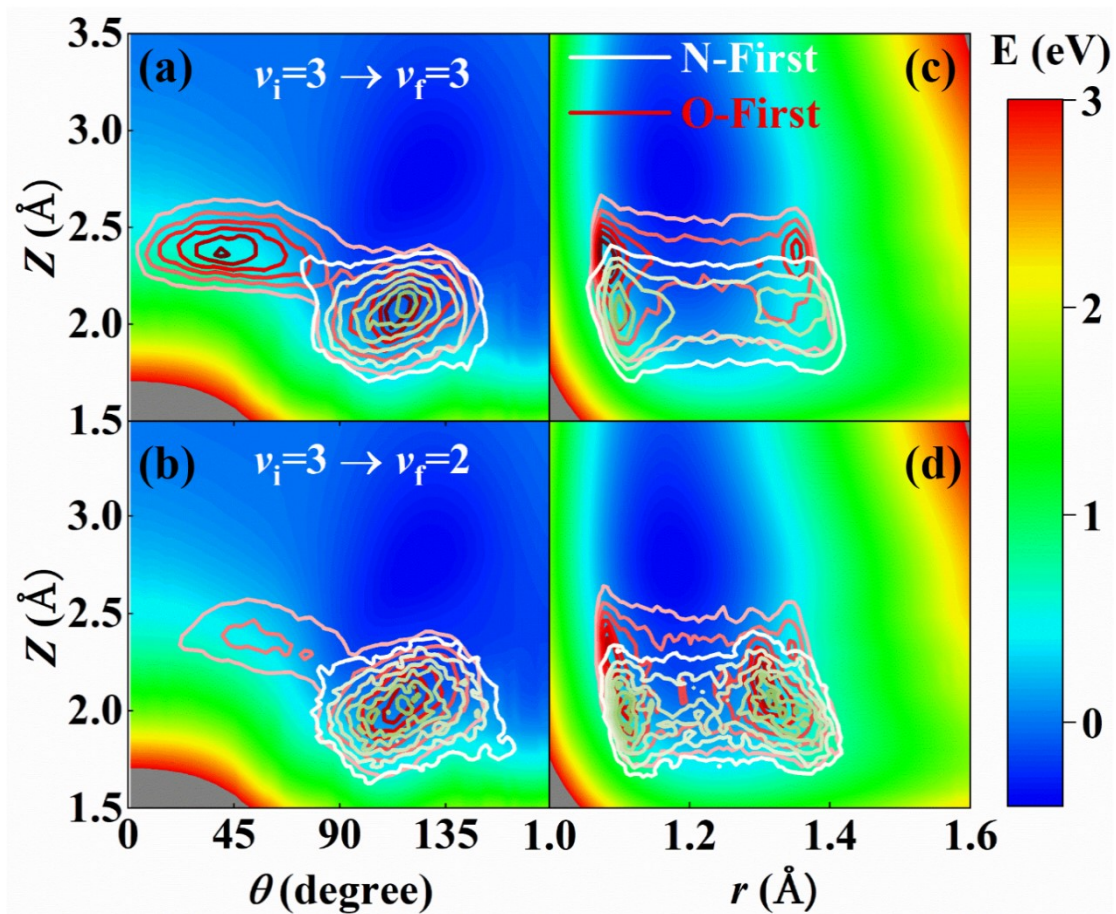

Fig. S6. Similar to Fig. S5 except for ODF-C trajectories.



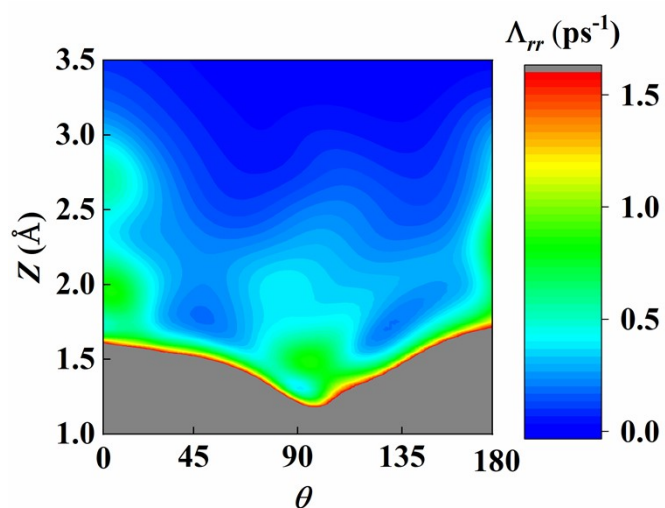

**Fig. S7.** Contour plot of the NN-ODF diagonal element ( $\Lambda_{rr}$ ) as a function of the NO center-of-mass above the surface ( $Z$ ) and the orientational angle ( $\theta$ ). Note that the 2D cut of the NN-ODF is obtained with all other coordinates and the surface configuration fixed at the adsorption state.
